1 **INTERACTION BETWEEN MYRICETIN AGGREGATES AND LIPASE UNDER SIMPLIFIED**  
2 **INTESTINAL CONDITIONS**

3 *Atma-Sol BUSTOS<sup>a,b\*</sup>, Andreas HÅKANSSON<sup>a</sup>, Javier A. LINARES-PASTÉN<sup>c</sup>, Lars NILSSON<sup>a</sup>*

4 <sup>a</sup> Food Technology, Faculty of Engineering LTH, Lund University, PO Box 124, S-221 00 Lund, Sweden

5 <sup>b</sup> School of Chemistry, Faculty of Pure and Natural Sciences, Universidad Mayor de San Andrés, PO Box 303, La Paz,  
6 Bolivia

7 <sup>c</sup> Biotechnology, Faculty of Engineering LTH, Lund University, PO Box 117, S-221 00 Lund, Sweden

8 e-mails: [atma-sol.bustos@food.lth.se](mailto:atma-sol.bustos@food.lth.se); [andreas.hakansson@food.lth.se](mailto:andreas.hakansson@food.lth.se); [javier.linares-pasten@biotek.lu.se](mailto:javier.linares-pasten@biotek.lu.se);  
9 [mauricio.penarrieta@gmail.com](mailto:mauricio.penarrieta@gmail.com); [lars.nilsson@food.lth.se](mailto:lars.nilsson@food.lth.se)

10 \*Corresponding author: Atma-Sol Bustos, Food Technology, Faculty of Engineering LTH, Lund University, PO Box 124,  
11 S-221 00 Lund, Sweden, [atma-sol.bustos@food.lth.se](mailto:atma-sol.bustos@food.lth.se), telephone number: +46 46 222 83 03

## 13 **Abstract**

14 Myricetin, a flavonoid found in the plant kingdom, has previously been identified as a food  
15 molecule with beneficial effects against obesity. This property has been related with its potential  
16 to inhibit lipase, the enzyme responsible of fat digestion. In this study we investigate the  
17 interaction between myricetin and lipase under simplified intestinal conditions from a colloidal  
18 point of view. The results show that myricetin form aggregates in aqueous medium and under  
19 simplified intestinal condition, where it was found that lipase is in its monomeric form. Although  
20 lipase inhibition by myricetin at a molecular level has been reported previously, the results of this  
21 study suggest that myricetin aggregates inhibit lipase by a sequestering mechanism as well. The  
22 size of these aggregates was determined to be in the range of a few nm to >200 nm.

## 23 **1. Introduction**

24 Myricetin is a polyphenol member of the flavonoids family. It is commonly found in the plant  
25 kingdom and present in a diversity of foods such as berries, teas and wines (1, 2). Besides its anti-  
26 oxidant properties, myricetin has been claimed to display several beneficial activities such as  
27 analgesic, anti-inflammatory, antitumor, and antidiabetic activities (3). As other compounds of  
28 the same family, myricetin can inhibit several digestive enzymes (4), for example lipase, the main  
29 enzyme in fat digestion. This enzyme has been intensely studied because of its relation to anti-  
30 obesity treatments (5, 6). In addition to myricetin, some other flavonoids have been proposed to  
31 be lipase inhibitors, for example it has been shown that quercetin can bind to lipase near the  
32 active site (7). Many of these studies are based on molecular docking, where the flavonoids are  
33 considered soluble compounds and the interaction happens at the molecular level. On the other

34 hand, other studies have shown that some flavonoids can aggregate in aqueous media and inhibit  
35 proteins by a sequestering mechanism (8, 9).

36 The myricetin content in some edible products is higher than its aqueous solubility, for instance  
37 green tea has been reported to contain approximately 6 µg of myricetin per ml (10), whereas the  
38 aqueous solubility is <1.5 µg/mL (11). Thus, it is likely that the majority of the molecules are not  
39 present as dissolved compounds and that they could be present as, for instance, supramolecular  
40 aggregates. The presence of myricetin aggregates in solution, can influence enzymatic assays.  
41 Bustos et al. (2019), have shown that the presence of phenolic aggregates can affect the  
42 reproducibility of lipase assays. Pohjala et al. (2012) have also discussed this issue and suggested  
43 that this disturbance can be reduced by adding surfactants that reduce aggregate formation  
44 when using enzymatic assays in the presence of flavonoids.

45 A challenge to applications trying to harness the many beneficial effects of myricetin is its low  
46 bioavailability; 10% absolute oral bioavailability in rats (12). In order to enhance its oral  
47 bioavailability, different approaches have been considered such as self-nanoemulsifying drug  
48 delivery systems (13) and myricetin co-crystal formation (11). However, there is a lack of  
49 information about pure myricetin aggregates. We argue that a fundamental colloidal  
50 understanding of myricetin aggregates in aqueous solutions and their interaction  
51 with digestive enzymes can help to understand its beneficial effects.

52 In this study we investigate myricetin under *in vitro* intestinal conditions and its interaction with  
53 pancreatic lipase since myricetin is absorbed in the small intestine (14). The hypothesis of this  
54 study is that myricetin can form aggregates under intestinal conditions and can inhibit lipase by  
55 a sequestering mechanism.

56 One of the gentlest techniques to analyze and separate proteins and aggregates is asymmetrical  
57 flow field-flow fractionation (AF4), where the separation of analytes is based on their diffusion  
58 coefficient and, thus, hydrodynamic radius ( $r_h$ ) (15). As compared to size exclusion  
59 chromatography (SEC), no stationary phase is utilized in AF4, thus reducing the potential loss of  
60 analyte by adsorption and the breakdown of aggregates by shear forces. Depending on the  
61 coupled detectors, AF4 can provide different properties of the analyte, such as size and molecular  
62 weight among others. The characterization and separation of proteins, protein oligomers and  
63 higher aggregates with AF4 is, by now, well established (15, 16). Thus, this technique is suitable  
64 for the research questions in this work.

## 65 **2. Methodology**

### 66 **2.1 Sample preparation**

67 In order to simulate intestinal conditions, the standardized static *in vitro* digestion method  
68 proposed by INFOGEST (17) was used as a guide. For this, three different stock solutions were  
69 prepared: 1) Simulated intestinal fluid (SIF) electrolyte solution (as described by INFOGEST), 2)  
70  $\text{CaCl}_2$  3 mM solution that is added separately to the SIF solution to prevent precipitation and 3)  
71 saturated lipase solution prepared by dissolving 10 mg of pancreatic lipase in 1 mL of SIF stock  
72 solution, followed by centrifugation for 10 min at room temperature at 11 000 g. The lipase stock  
73 solution had a final concentration of 20  $\mu\text{M}$ , determined using BCA protein assay Kit (Thermo  
74 Scientific) with bovine serum albumin (BSA) as reference protein. In addition, 7 different  
75 myricetin stock solutions were prepared in DMSO and mixed with the other solutions to get the  
76 next final concentrations: 0, 40, 60, 200, 400, 600, and 1000  $\mu\text{M}$ . The final intestinal solution was  
77 prepared, as shown in Table 1. This solution is based on a “typical example” for the intestinal

78 phase proposed by INFOGEST, where bile salts were replaced with water and only lipase was  
79 used as enzyme in order to study mainly lipase effects. In addition, aqueous solutions were  
80 prepared for each myricetin concentration together with two kinds of control samples (Table 1).

81 **Table 1.** Sample composition

| Sample name                       | Water<br>( $\mu\text{L}$ ) | SIF stock<br>( $\mu\text{L}$ ) | CaCl <sub>2</sub> stock<br>( $\mu\text{L}$ ) | Saturated lipase<br>stock ( $\mu\text{L}$ ) | Myricetin –<br>stock ( $\mu\text{L}$ ) |
|-----------------------------------|----------------------------|--------------------------------|----------------------------------------------|---------------------------------------------|----------------------------------------|
| Myricetin–<br>intestinal solution | 95                         | 0                              | 20                                           | 80                                          | 5                                      |
| Myricetin–water                   | 195                        | -                              | -                                            | -                                           | 5                                      |
| Myricetin–control                 | 95                         | 80                             | 20                                           | -                                           | 5                                      |
| Lipase–control                    | 95                         | 0                              | 20                                           | 80                                          | 5*                                     |

82 \* 0  $\mu\text{M}$  myricetin solution

## 83 2.2 Aggregate formation

84 The aggregate formation in myricetin–water and myricetin–intestinal solution samples were  
85 measured by turbidity. For this, optical density (OD) changes, for 4 different myricetin  
86 concentrations (60, 200, 600 and 1000  $\mu\text{M}$ ) and a blank (0  $\mu\text{M}$ ), were measured at 800 nm with  
87 a microplate reader (Spectrostar Nano with MARS 3.20 R2 data analysis software, BMG Labtech,  
88 Germany). An increase in optical density, with respect to the blank, was taken to indicate  
89 aggregate formation. The aggregation experiments were performed at and 37 °C for 2 h

90 (standard digestion time in the INFOGEST method). All measurements were performed in  
91 duplicates.

## 92 **2.3 Myricetin – lipase interaction.**

### 93 **2.3.1 Sample treatment**

94 In order to study the interaction between myricetin and lipase, the remaining lipase in solution  
95 was determined after its interaction with different concentrations of myricetin. For this purpose,  
96 8 samples were prepared following Table 1 (see section 2.1 Sample preparation): One myricetin–  
97 control samples of 1000  $\mu\text{M}$  that contained only myricetin and not lipase, one lipase–control  
98 sample (0  $\mu\text{M}$  myricetin concentration) and 6 different myricetin–intestinal solutions: 40, 60, 200,  
99 400, 600 and 1000  $\mu\text{M}$ . After 2 hours of incubation at room temperature, the samples were  
100 centrifuged at 11 000 g for 10 min. The supernatant was filtered with a filter syringe with cut-off  
101 at 0.2  $\mu\text{m}$  (VWR International, USA) before the analysis. All the samples were analyzed by AF4  
102 with multiple detectors, see description in the next subsection.

### 103 **2.3.2 AF4 instrumentation**

104 The AF4 system was an Eclipse 3+ (Wyatt Technology, Dernbach, Germany) connected to an UV  
105 detector operating at 330 nm (UV-975 detector, Jasco Corp., Tokyo, Japan), to a multi-angle light  
106 scattering (MALS) detector with a wavelength of 663.8 nm (Dawn Heleos II, Wyatt Technology)  
107 and a differential refractive index (dRI) detector (Optilab T – rEX, Wyatt Technology) operating at  
108 658.0 nm wavelength. An Agilent 1100 pump (Agilent Technologies, Waldbronn, Germany)  
109 coupled to a vacuum degasser was used to deliver the carrier liquid. The injection of the sample  
110 onto the channel was performed by an Agilent 1100 auto-sampler. For the analysis, a trapezoidal

111 long channel (Wyatt Technology) with 26.0 cm length and inlet and outlet widths of 2.15 and 0.6  
112 cm, respectively was used. The nominal channel thickness was 350  $\mu\text{m}$ . An ultrafiltration  
113 membrane of regenerated cellulose was used for the accumulation wall, with 10 kDa nominal  
114 cut-off (Merck Millipore, Bedford, MA, USA). 2mg/ml BSA solution was used to verify the  
115 performance of the channel, to normalize the MALS detector and aligning detectors.

### 116 **2.3.3 AF4 method parameters**

117 Prior to the injection, 1 min of elution and 1 minute of focus mode were applied to flush and  
118 stabilize the channel. The liquid carrier was 20 mM tris-HCl buffer (pH 8) during the whole  
119 experiment. 50  $\mu\text{L}$  of sample were injected onto the channel at 0.2 ml/min flow rate for 2 min in  
120 focusing mode. After that, 3 min of focusing was applied, followed by 20 min of elution at 5  
121 ml/min constant cross flow followed by 7 min without cross flow to flush the channel. 1 ml/min  
122 of detector flow was applied in all the steps.

### 123 **2.3.4 AF4 data processing**

124 Astra software 6.1 (Wyatt Technology) was used for the data analysis. The molecular weight of  
125 lipase - control sample was obtained from MALS and dRI detectors, applying the Zimm model  
126 (18) with a 1<sup>st</sup> order fit using 12 scattering angles (from 44.8° to 149.0°). The refractive index  
127 increment ( $dn/dc$ ) used was 0.185 ml/mg (19), a generic protein value based on BSA. The second  
128 virial coefficient was assumed to be negligible.

129 dRI fractograms were used for lipase quantification, where the peak maximum was used to  
130 calculate the relative concentrations, normalized in relation to the lipase-control sample.

131 The Stokes-Einstein equation was applied to determine the hydrodynamic radius ( $r_h$ ),

132 
$$r_h = \frac{kT}{6\pi\eta D} \quad (1)$$

133 where k is the Boltzmann constant, T is the absolute temperature and  $\eta$  is dynamic viscosity of  
134 the solvent and D is the translational diffusion coefficient. by using the FFFhydRad 2.1 MATLAB  
135 App (20). The channel thickness (w) was 286.4  $\mu\text{m}$ , determined using BSA with a hydrodynamic  
136 diameter of 6.6 nm. The void time ( $t^0$ ) was calculated according to Wahlund & Nilsson, 2012.

137 **2.4 Statistical analysis.**

138 t- tests were used assuming equal variance between conditions. The significance limit was set to  
139 1 %.

140 **2.5 Molecular dynamic simulations.**

141 A single monomeric subunit of porcine pancreatic lipase was prepared from the crystallographic  
142 structure available in the Protein Data Bank (PDB 1ETH). Atomic coordinates of co-lipase and  
143 other ligands were removed. This monomer was subjected to molecular dynamic simulations in  
144 GROMACS 2016 (21) using the AMBER03 force field (22). The conditions were 20 °C, pH 7.5 and  
145 1 bar during 500 ns. The solvent was simulated with TIP3P water molecules and sodium chloride  
146 ions in a concentration of 0.9% (w/v) filled into a simulation cubic box of 10 Å extension from the  
147 protein. Periodic boundaries, 2.5 fs time steps and 8 Å cutoff of short-range electrostatic and van  
148 der Waals forces and long-range forces calculated by PME was applied (23). The system was  
149 subjected to energy minimization by steepest descent algorithm with a maximum of 50 000 steps  
150 considering a step size of 0,1 Å and a tolerance of 1000 kJ/mol. Next, a two steps equilibration  
151 was performed. First, the temperature was stabilized under NVT ensemble with temperature  
152 coupling by a modified Berendsen thermostat (24). Second, the pressure was stabilized under



153 NPT ensemble with a pressure coupling by the Parrinello-Rahman method (25). In both steps, the  
154 simulation time was 100 ps with time steps of 2 fs. Finally, the production phase was simulated  
155 for 500 ns and trajectories were saved every 1.25 ns and the radius of gyration ( $r_g$ ) was calculated.

### 156 **2.5.1 Calculation of the hydrodynamic radius from the molecular structure**

157 The average molecular structure of the lipase, resulted from the molecular dynamic simulation,  
158 was used to calculate the translational diffusion coefficient with HYDROPRO program (Ortega et  
159 al., 2011). The hydrodynamic radius ( $r_h$ ) was obtained with the Stokes-Einstein equation (Eq. 1).

## 160 **3. Results and discussions**

### 161 **3.1. Aggregates formation**

162 In order to understand if myricetin forms aggregates in aqueous medium and under intestinal  
163 conditions, the turbidity of the different solutions was measured after two hours (Fig. 1). The  
164 results are expressed as optical densities.

165 **Figure 1.** Aggregate formation of myricetin in water and intestinal solution for 4 different concentrations at 37 °C.  
166 The optical density was measured at 37 °C after 2 hours of incubation at a wavelength of 800 nm. The error bars  
167 represent the pooled standard deviation from duplicates.

168 The increased optical density displayed in Figure 1 shows that myricetin can form aggregates in  
169 aqueous solutions, as reported previously (26) and that the optical density increases with  
170 increasing myricetin concentration. For the data obtained in water, it is possible to see that for  
171 600 and 1000  $\mu\text{M}$  of myricetin, there is a significant change in the optical density (with respect  
172 to the blank), indicating that after two hours myricetin aggregates were detected at those  
173 concentrations. The lowest concentrations do not show significant changes in the optical density.

174 On the other hand, under intestinal conditions, significant changes in optical density at all the  
175 investigated concentrations are observed. The results show that aggregates are formed in the  
176 entire investigated concentration range. The optical density when adding myricetin to water is  
177 more than double the optical density in the intestinal solution.

### 178 **3.2. Myricetin – lipase interaction**

179 The results from the previous section indicate that myricetin form aggregates under the  
180 simulated intestinal solution. In order to understand if these aggregates are a combination of  
181 myricetin and lipase or consist of myricetin molecules alone, additional experiments were  
182 performed.

183 The remaining lipase in solution, after interaction with myricetin under the simulated intestinal  
184 condition, was quantified using AF4-dRI (see section 3.2.1). In addition, AF4-UV was used to  
185 analyze myricetin aggregates (see section 3.2.2).

186 Figure 2 shows the AF4–UV–dRI fractograms of myricetin and lipase-control samples (see Table  
187 1). The dRI-fractograms (A) show a peak at elution time of 4.8 min that correspond to lipase with  
188 a determined molecular weight of 50 kDa (obtained from AF4–MALS–dRI fractograms, see  
189 supplementary information), this corresponds to the molecular weight of monomeric lipase  
190 previously reported (27). The myricetin sample does not present any significant peak from this  
191 detector. The UV fractograms (B) shows two peaks, one at 2 min that correspond to myricetin  
192 and the second at 4.8 min that correspond to lipase. The injected amount of myricetin and lipase,  
193 reported in figure 2, correspond to the maximum amount analyzed in this study. It should be  
194 noted that all AF4 separation are carried out with an accumulation wall membrane cut-off of 10

195 kDa. This would cause molecularly dissolved myricetin to exit the AF4 channel through the  
196 accumulation wall and lost from the separation. Hence, the analyzed myricetin represents supra-  
197 molecular aggregates.

198 **Figure 2** AF4–dRI (A) and UV (B) fractograms for pure lipase and pure myricetin solution. The injected mass is 25 µg  
199 lipase and 16 µg myricetin respectively.  $t^0$  denotes the void time at 19 sec.

### 200 **3.2.1. Sequestering of lipase**

201 Figure 3A shows the AF4–dRI fractograms of lipase after the interaction with different myricetin  
202 concentrations. The retention time remains the same for all the concentrations tested. The  
203 height of the peak from figure 3A is plotted against myricetin concentrations in figure 3B. The  
204 results at all the concentration are significantly different from the lipase-control sample (0 µM of  
205 myricetin), indicating that myricetin can sequester lipase at all the investigated concentrations.  
206 Myricetin can sequester up to 20 % of lipase under simplified intestinal conditions (Figure 3B). As  
207 an decrease in lipase concentration also mean a decrease in activity, the results from figure 3  
208 show that lipase inhibition by myricetin can occur at the colloidal level and not only at the  
209 molecular level, as has been previously reported (28). Although there are some studies that have  
210 shown that flavonoids, such as quercetin, can sequester enzymes exist (8), this has not been  
211 shown for myricetin.

212 **Figure 3.** AF4–dRI analyses of the remnant pancreatic lipase after its interaction with different concentrations of  
213 myricetin (the sample was filtered before the analyses, see section 2.3.1). (A) Fractograms. (B) Relative dRI peak  
214 heights of lipase vs myricetin concentration.  $t^0$  denotes the void time at 19 sec.

### 215 **3.2.2. Aggregate characterization**

216 The aggregates formed between lipase and myricetin can be divided in two classes: 1) The  
217 aggregates that were removed by filtration before the AF4 analysis and 2) the aggregates that  
218 remains in the sample. For 1) no more experiments were performed, therefore it can only be  
219 concluded that the aggregates would have a radius higher than approximately 100 nm (filter cut-  
220 off) and that they could be composed of pure myricetin aggregates as well as myricetin–lipase  
221 aggregates since myricetin is shown to sequester lipase. These aggregates will be referred to as  
222 *large myricetin aggregates*. For 2, a more detailed characterization is performed with AF4-UV  
223 (*small myricetin aggregates*).

224 The results from AF4-UV are presented in figure 4, where two main populations are observed.  
225 The first population corresponds to myricetin aggregates, as was also observed in the control  
226 samples (figure 2) and the amount in this population increases with myricetin concentration. The  
227 second population represents an increasing amount of aggregates (UV-signal increases) as well  
228 as an in aggregate size (population broadens to longer retention times) with increasing myricetin  
229 concentration. In the absence of lipase, myricetin does not present any second peak (Fig 2),  
230 therefore, the second peak in figure 4 should consist of lipase-myricetin aggregates.

231 **Figure 4.** AF4–UV fractogram of different concentrations of myricetin with 0.5 mg/ml lipase.  $t^0$  denotes the void time  
232 at 19 sec.

233 The hydrodynamic radii ( $r_h$ ) for the small myricetin aggregates (Fig. 4), myricetin-lipase  
234 aggregates (Fig. 4) and for lipase (Fig. 2) were estimated from AF4 retention time. In order to  
235 estimate the  $r_h$  with sufficient reliability, a retention level  $> 5$  is required (15). The retention level  
236 ( $R_L$ ) can be calculated according to equation 2

237 
$$R_L = \frac{t_r}{t^0} \quad (2)$$

238 were  $t_r$  represents the retention time and  $t^0$  the void time. Note that for the peaks in figure 4,  $R_L$   
239  $> 5$ . The results for the estimated  $r_h$  as well as the retention levels are given in Table 2. The  $t^0$  is  
240 19 sec.

241 **Table 2. Hydrodynamic radii**

| Analyte                     | $r_h$ (nm) | retention time (min) | retention level |
|-----------------------------|------------|----------------------|-----------------|
| Lipase                      | 3.1        | 4.8                  | 15              |
| Small myricetin aggregates  | 1.3        | 2.1                  | 7               |
| Myricetin–lipase aggregates | 2.2 – 4.2  | 3.4 – 6.5            | $> 11$          |

242  
243 From table 2 we can see that the size of the small myricetin aggregates is in the range of a few  
244 nm. Large myricetin aggregates were previously detected by dynamic light scattering (DLS) (26,  
245 29), but the use of separation with AF4 allowed for the detection of smaller myricetin aggregates  
246 without the interference of large aggregates. The myricetin-lipase aggregates are somewhat  
247 large but remain in a size range  $< 10$  nm.

248 The AF4-MALS-dRI analysis (supplementary material, fig S1) shows that lipase is in its monomeric  
249 form (see section 3.2), therefore the  $r_h$  of lipase found in Table 2 represents the monomeric form.

### 250 **3.2.3. Molecular dynamic simulations**

251 An important conclusion from Section 3.2.2 is that  $r_h$  found for lipase correspond to the  
252 monomeric form ( $r_h = 3.1$  nm). Since this influence how it could interact with the myricetin, we

253 believe that a verification of this finding is required. In order to confirm this result, the size of  
254 monomeric lipase was investigated with molecular dynamics simulation. The average radius of  
255 gyration obtained was 2.6 nm (see supplementary information, fig S2) and the hydrodynamic  
256 radius of the average structure 3.3 nm. The last is consistent with the  $r_h$  obtained experimentally  
257 (table 2), supporting that the lipase studied under the simplified intestinal conditions is present  
258 as monomer. In addition, the myricetin–lipase aggregates reach  $r_h$  of 4.2 nm (table 2), suggesting  
259 that monomeric lipase can form aggregates with myricetin molecules.

#### 260 **4. Conclusion**

261 In this paper, interaction and aggregate formation between myricetin and lipase was studied in  
262 water and simulated intestinal conditions. Myricetin forms aggregates under both solution  
263 conditions in a size-range from a few nanometers up to > 100 nm and the extent of aggregate  
264 formation is dependent on myricetin concentration. Furthermore, the myricetin aggregates can  
265 interact with lipase under simplified intestinal conditions and causes sequestering of lipase from  
266 solution. The sequestering, thus, causes a decrease in lipase activity and the amount of lipase  
267 sequestered is dependent on myricetin concentration.

#### 268 **5. Acknowledgements**

269 The present work is supported by Swedish International Development Agency (SIDA): a  
270 collaboration project between Universidad Mayor de San Andrés (Bolivia) and Lund University  
271 (Sweden) [grant numbers 75000553-02]

272 The scientific and technical computing center of the University of Lund (LUNARC) is  
273 acknowledged for providing computational resources for the molecular dynamic simulations.

## 274 6. References

- 275 1. Yuda N, Tanaka M, Suzuki M, Asano Y, Ochi H, Iwatsuki K. Polyphenols extracted from black tea  
276 (Camellia sinensis) residue by hot-compressed water and their inhibitory effect on pancreatic lipase in  
277 vitro. *J Food Sci.* 2012;77:H254-H61.
- 278 2. Yao LH, Jiang YM, Shi J, Tomás-Barberán FA, Datta N, Singanusong R, et al. Flavonoids in Food and  
279 Their Health Benefits. *Plant Foods for Human Nutrition.* 2004;59(3):113-22.
- 280 3. Semwal DK, Semwal RB, Combrinck S, Viljoen A. Myricetin: A Dietary Molecule with Diverse  
281 Biological Activities. *Nutrients.* 2016;8(2):90.
- 282 4. Tan Y, Chang SKC, Zhang Y. Comparison of  $\alpha$ -amylase,  $\alpha$ -glucosidase and lipase inhibitory activity  
283 of the phenolic substances in two black legumes of different genera. *Food Chemistry.* 2017;214:259-68.
- 284 5. Lee EM, Lee SS, Chung BY, Cho J-Y, Lee IC, Ahn SR, et al. Pancreatic Lipase Inhibition by C-Glycosidic  
285 Flavones Isolated from *Eremochloa ophiuroides*. *Molecules.* 2010;15(11):8251.
- 286 6. Guercioli R. Mode of action of orlistat. *Int J Obes Relat Metab Disord.* 1997;21 Suppl 3:S12-23.
- 287 7. Martínez-González AI, Álvarez-Parrilla E, Díaz-Sánchez ÁG, de la Rosa LA, Núñez-Gastélum JA,  
288 Vázquez-Flores AA, et al. In vitro Inhibition of Pancreatic Lipase by Polyphenols: A Kinetic, Fluorescence  
289 Spectroscopy and Molecular Docking Study. *Food Technology and Biotechnology.* 2017;55(4):519-30.
- 290 8. McGovern SL, Caselli E, Grigorieff N, Shoichet BK. A Common Mechanism Underlying Promiscuous  
291 Inhibitors from Virtual and High-Throughput Screening. *Journal of Medicinal Chemistry.* 2002;45(8):1712-  
292 22.
- 293 9. McGovern SL, Helfand BT, Feng B, Shoichet BK. A Specific Mechanism of Nonspecific Inhibition.  
294 *Journal of Medicinal Chemistry.* 2003;46(20):4265-72.
- 295 10. Medina-Remón A, Manach C, Knox C, Wishart DS, Perez-Jimenez J, Rothwell JA, et al. Phenol-  
296 Explorer 3.0: a major update of the Phenol-Explorer database to incorporate data on the effects of food  
297 processing on polyphenol content. *Database.* 2013;2013.
- 298 11. Hong C, Xie Y, Yao Y, Li G, Yuan X, Shen H. A Novel Strategy for Pharmaceutical Cocrystal  
299 Generation Without Knowledge of Stoichiometric Ratio: Myricetin Cocrystals and a Ternary Phase  
300 Diagram. *Pharmaceutical Research.* 2015;32(1):47-60.
- 301 12. Dang Y, Lin G, Xie Y, Duan J, Ma P, Li G, et al. Quantitative determination of myricetin in rat plasma  
302 by ultra performance liquid chromatography tandem mass spectrometry and its absolute bioavailability.  
303 *Drug research.* 2014;64(10):516-22.
- 304 13. Qian J, Meng H, Xin L, Xia M, Shen H, Li G, et al. Self-nanoemulsifying drug delivery systems of  
305 myricetin: Formulation development, characterization, and in vitro and in vivo evaluation. *Colloids and  
306 Surfaces B: Biointerfaces.* 2017;160:101-9.
- 307 14. Xue C-f, Guo J-m, Qian D-w, Duan J-a, Shu Y. [Absorption of flavonoids from *Abelmoschus manihot*  
308 extract by in situ intestinal perfusion]. *Yao Xue Xue Bao.* 2011;46(4):454-9.
- 309 15. Wahlund K-G, Nilsson L. Flow FFF – Basics and Key Applications. In: Williams SKR, Caldwell KD,  
310 editors. *Field-Flow Fractionation in Biopolymer Analysis.* Vienna: Springer Vienna; 2012. p. 1-21.
- 311 16. Nilsson L. Separation and characterization of food macromolecules using field-flow fractionation:  
312 A review. *Food Hydrocolloids.* 2013;30(1):1-11.
- 313 17. Minekus M, Alminger M, Alvito P, Ballance S, Bohn T, Bourlieu C, et al. A standardised static in  
314 vitro digestion method suitable for food – an international consensus. *Food & Function.* 2014;5(6):1113-  
315 24.
- 316 18. Zimm BH. The Scattering of Light and the Radial Distribution Function of High Polymer Solutions.  
317 *The Journal of Chemical Physics.* 1948;16(12):1093-9.
- 318 19. Theisen A. *Refractive increment data book for polymer and biomolecular scientists.* Nottingham:  
319 Nottingham Univ. Press; 2000.

- 320 20. Håkansson A, Magnusson E, Bergenståhl B, Nilsson L. Hydrodynamic radius determination with  
321 asymmetrical flow field-flow fractionation using decaying cross-flows. Part I. A theoretical approach.  
322 *Journal of Chromatography A*. 2012;1253:120-6.
- 323 21. Abraham MJ, Murtola T, Schulz R, Páll S, Smith JC, Hess B, et al. GROMACS: High performance  
324 molecular simulations through multi-level parallelism from laptops to supercomputers. *SoftwareX*.  
325 2015;1-2:19-25.
- 326 22. Wang J, Wolf RM, Caldwell JW, Kollman PA, Case DA. Development and testing of a general amber  
327 force field. *Journal of computational chemistry*. 2004;25(9):1157-74.
- 328 23. Aronsson A, Güler F, Petoukhov MV, Crennell SJ, Svergun DI, Linares-Pastén JA, et al. Structural  
329 insights of RmXyn10A – A prebiotic-producing GH10 xylanase with a non-conserved aglycone binding  
330 region. *Biochimica et Biophysica Acta (BBA) - Proteins and Proteomics*. 2018;1866(2):292-306.
- 331 24. Bussi G, Donadio D, Parrinello M. Canonical sampling through velocity rescaling. *The Journal of*  
332 *Chemical Physics*. 2007;126(1):014101.
- 333 25. Nosé S, Klein ML. Constant pressure molecular dynamics for molecular systems. *Molecular*  
334 *Physics*. 1983;50(5):1055-76.
- 335 26. Bustos A-S, Håkansson A, Linares-Pastén JA, Peñarrieta JM, Nilsson L. Interaction Between  
336 Phenolic Compounds and Lipase: The Influence of Solubility and Presence of Particles in the IC50 Value.  
337 *Journal of Food Science*. 2018;83(8):2071-6.
- 338 27. Birner-Grunberger R, Scholze H, Faber K, Hermetter A. Identification of various lipolytic enzymes  
339 in crude porcine pancreatic lipase preparations using covalent fluorescent inhibitors. *Biotechnology and*  
340 *bioengineering*. 2004;85(2):147-54.
- 341 28. Zhang C, Ma Y, Gao F, Zhao Y, Cai S, Pang M. The free, esterified, and insoluble-bound phenolic  
342 profiles of *Rhus chinensis* Mill. fruits and their pancreatic lipase inhibitory activities with molecular  
343 docking analysis. *Journal of Functional Foods*. 2018;40:729-35.
- 344 29. Pohjala L, Tammela P. Aggregating Behavior of Phenolic Compounds — A Source of False Bioassay  
345 Results? *Molecules*. 2012;17(9):10774.



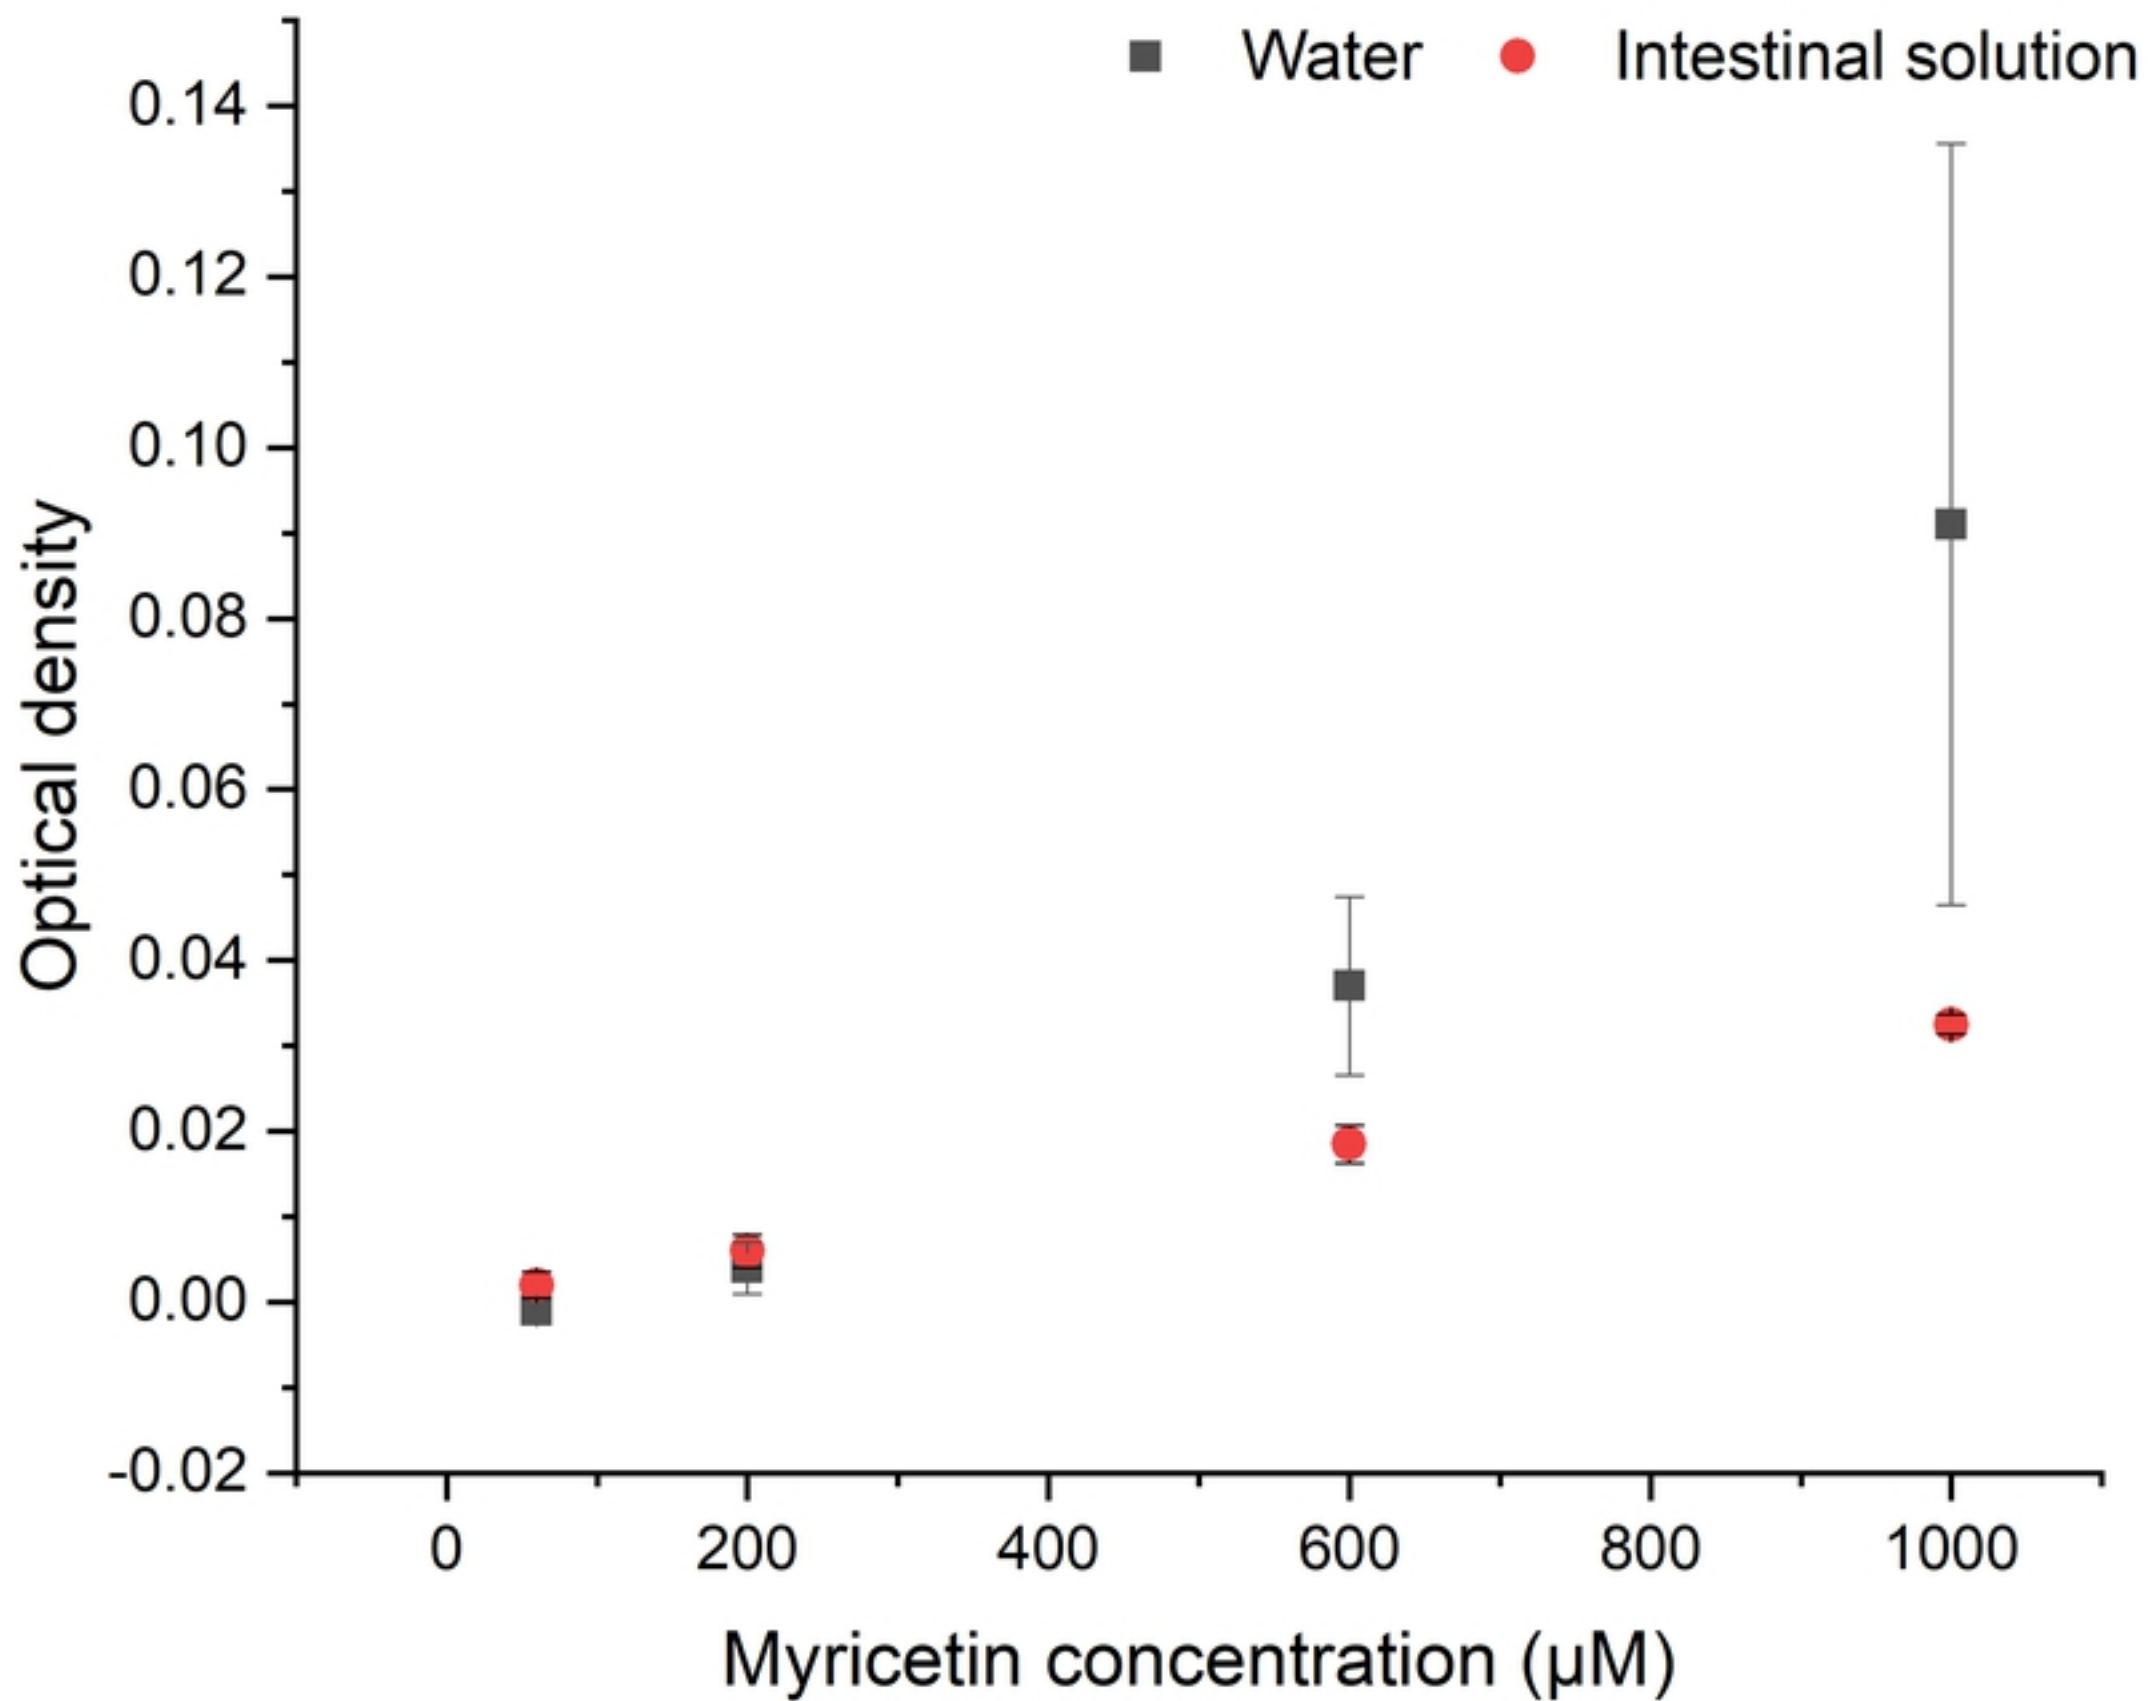

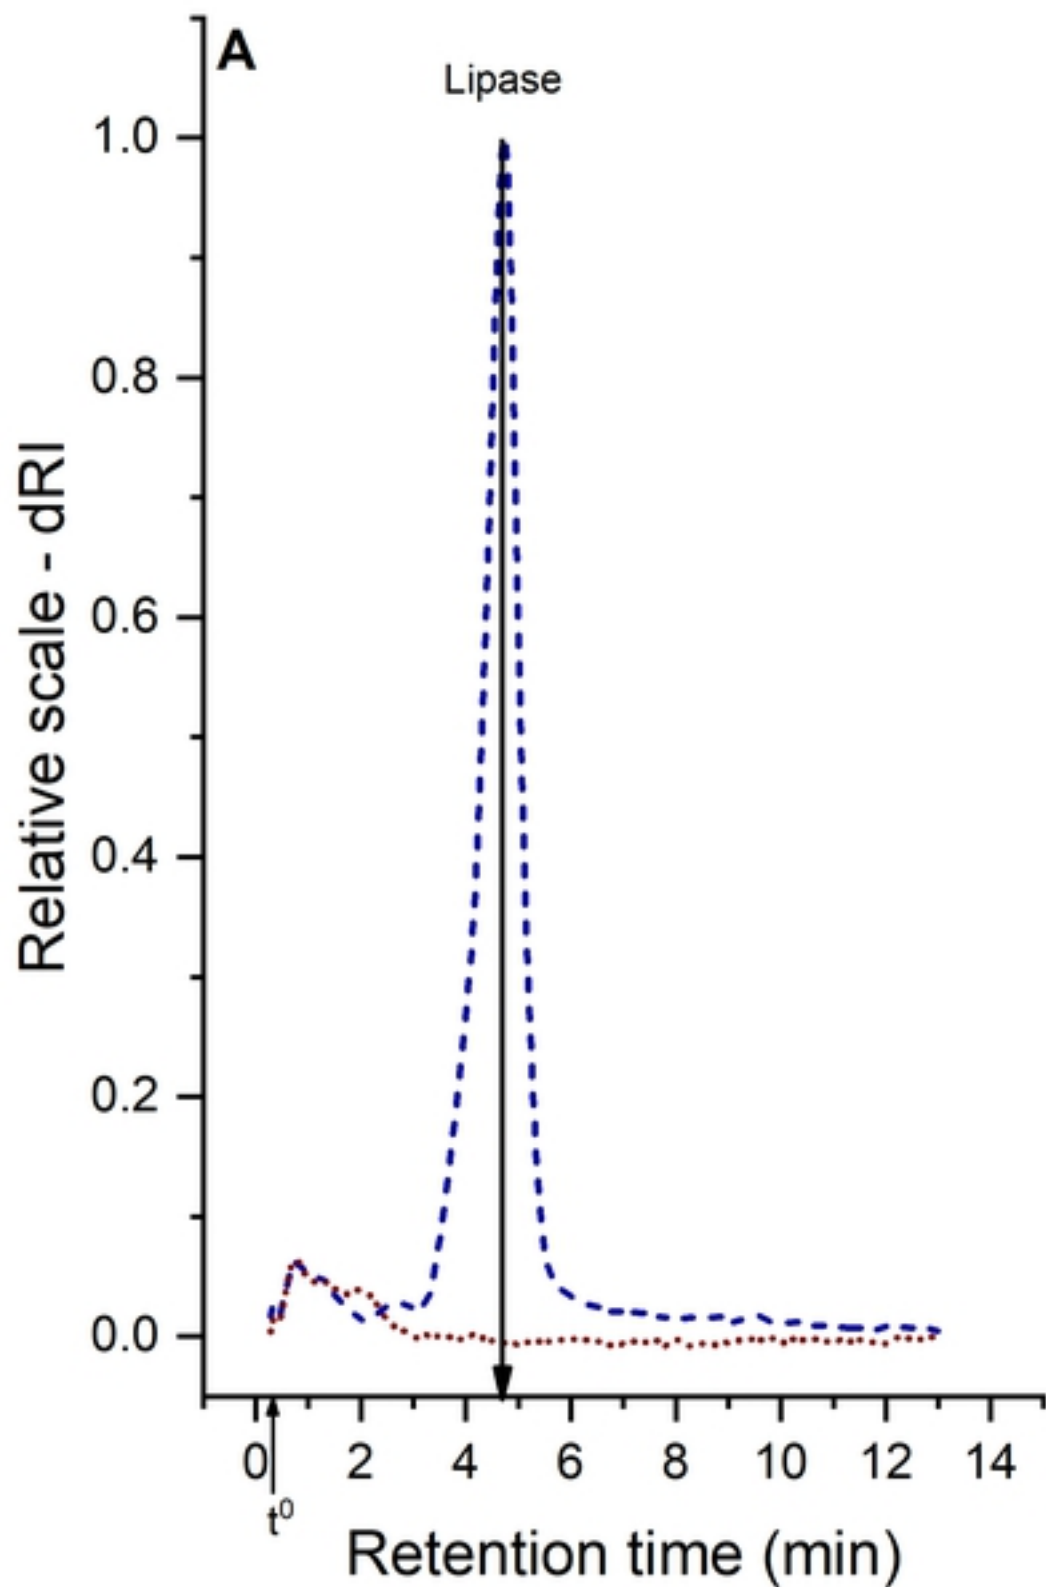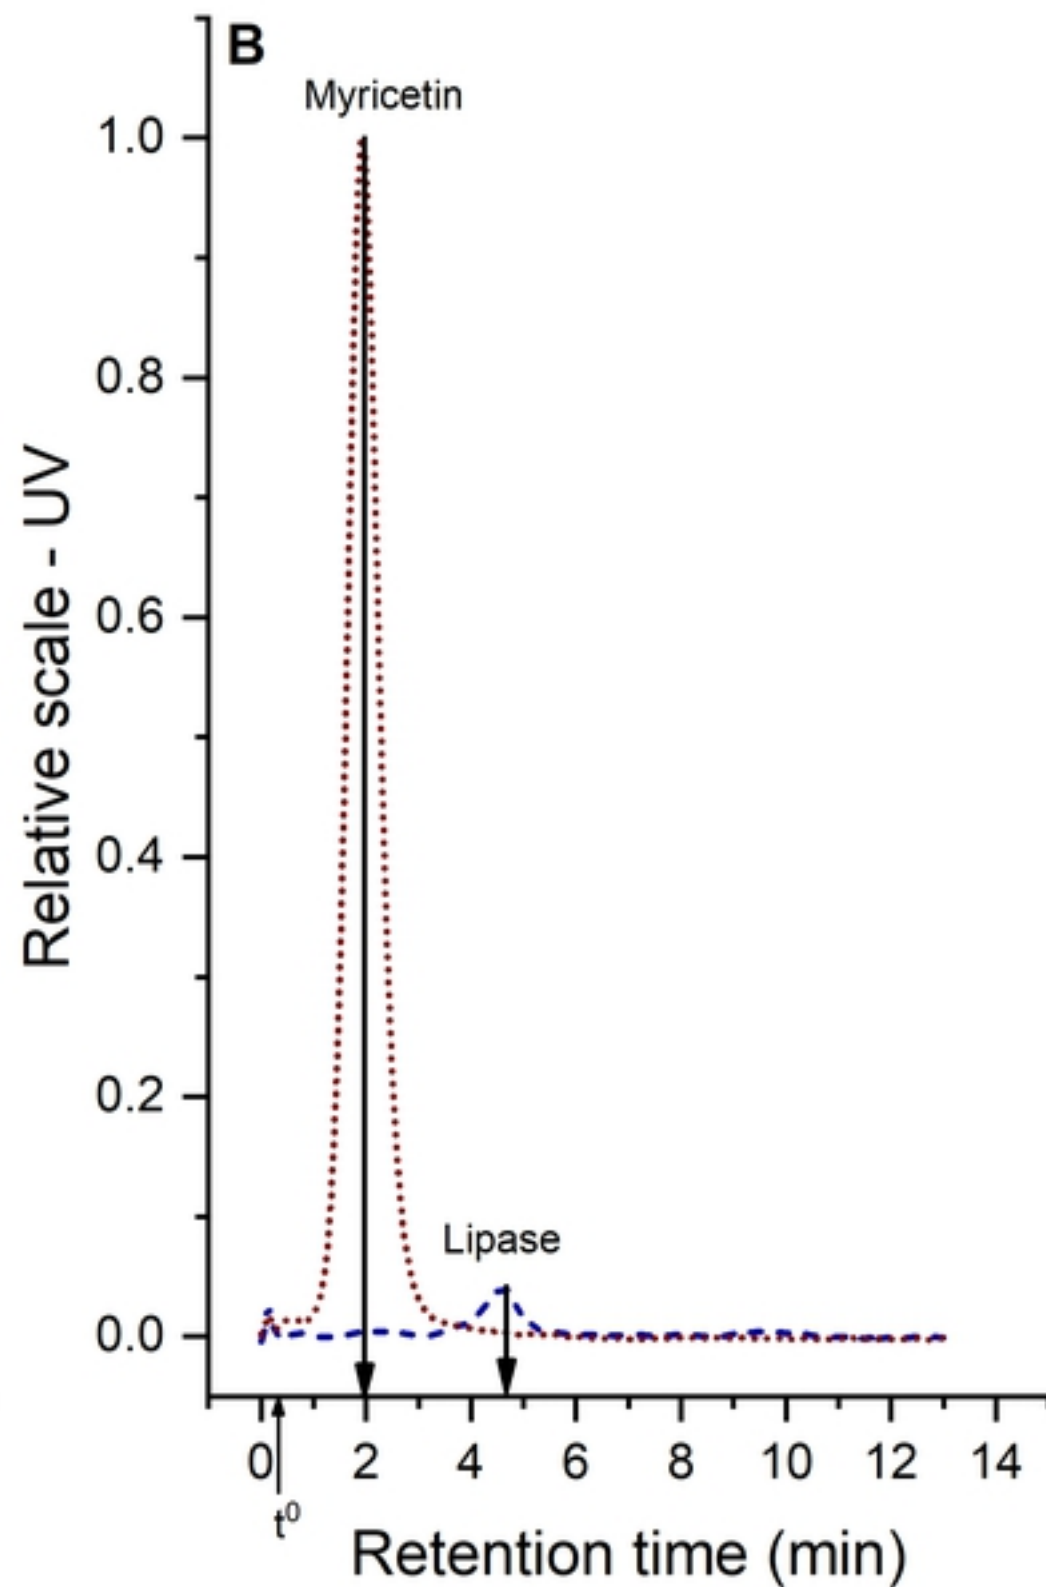

--- Lipase ..... Myricetin

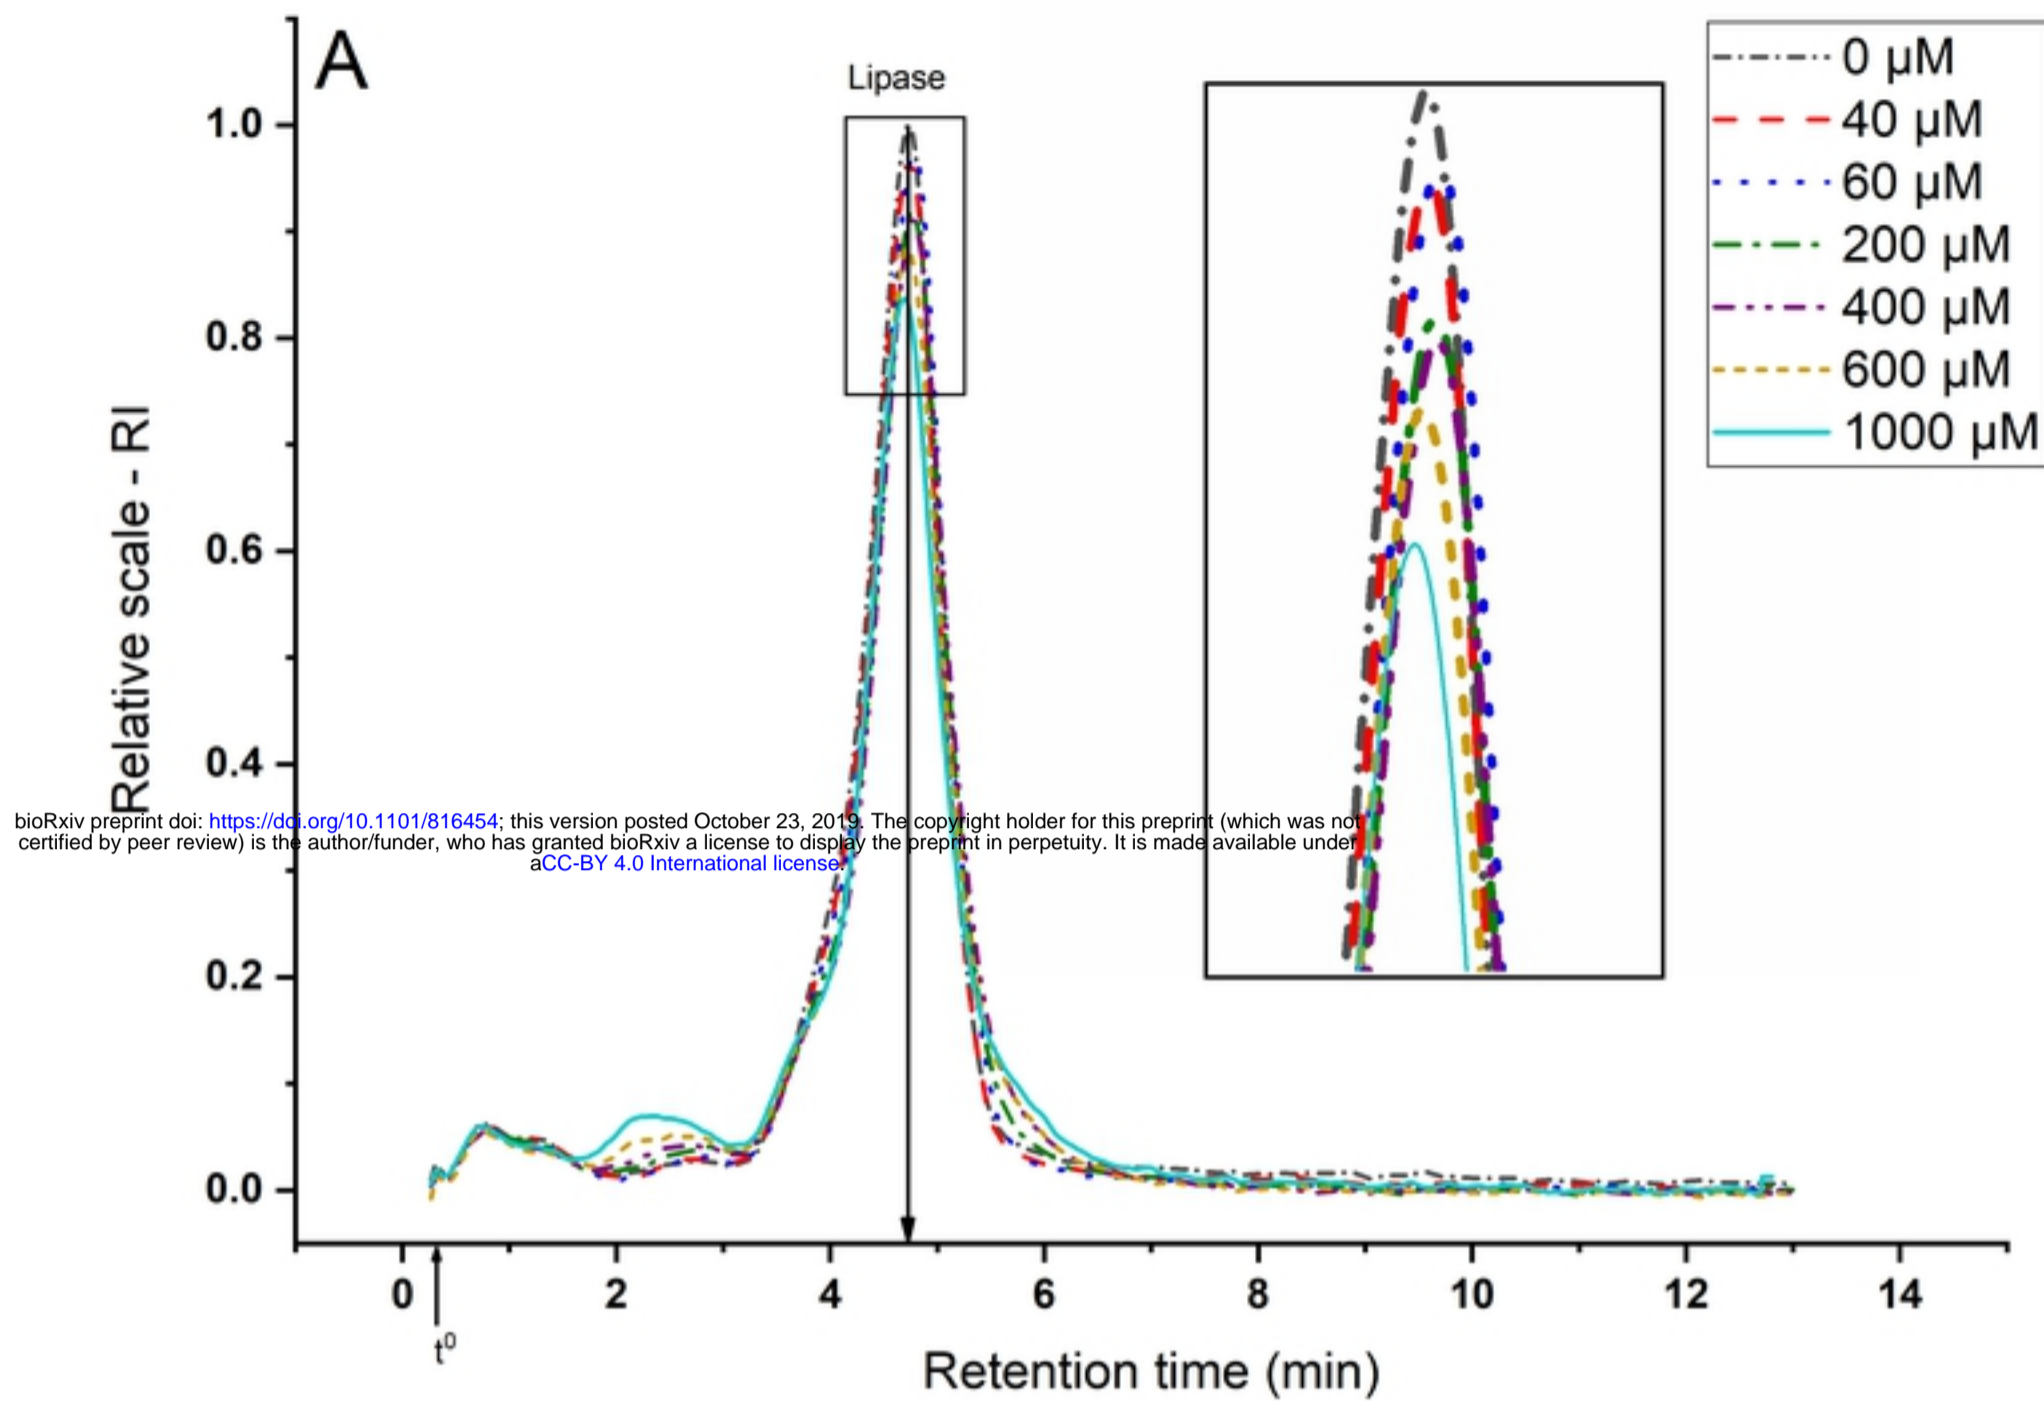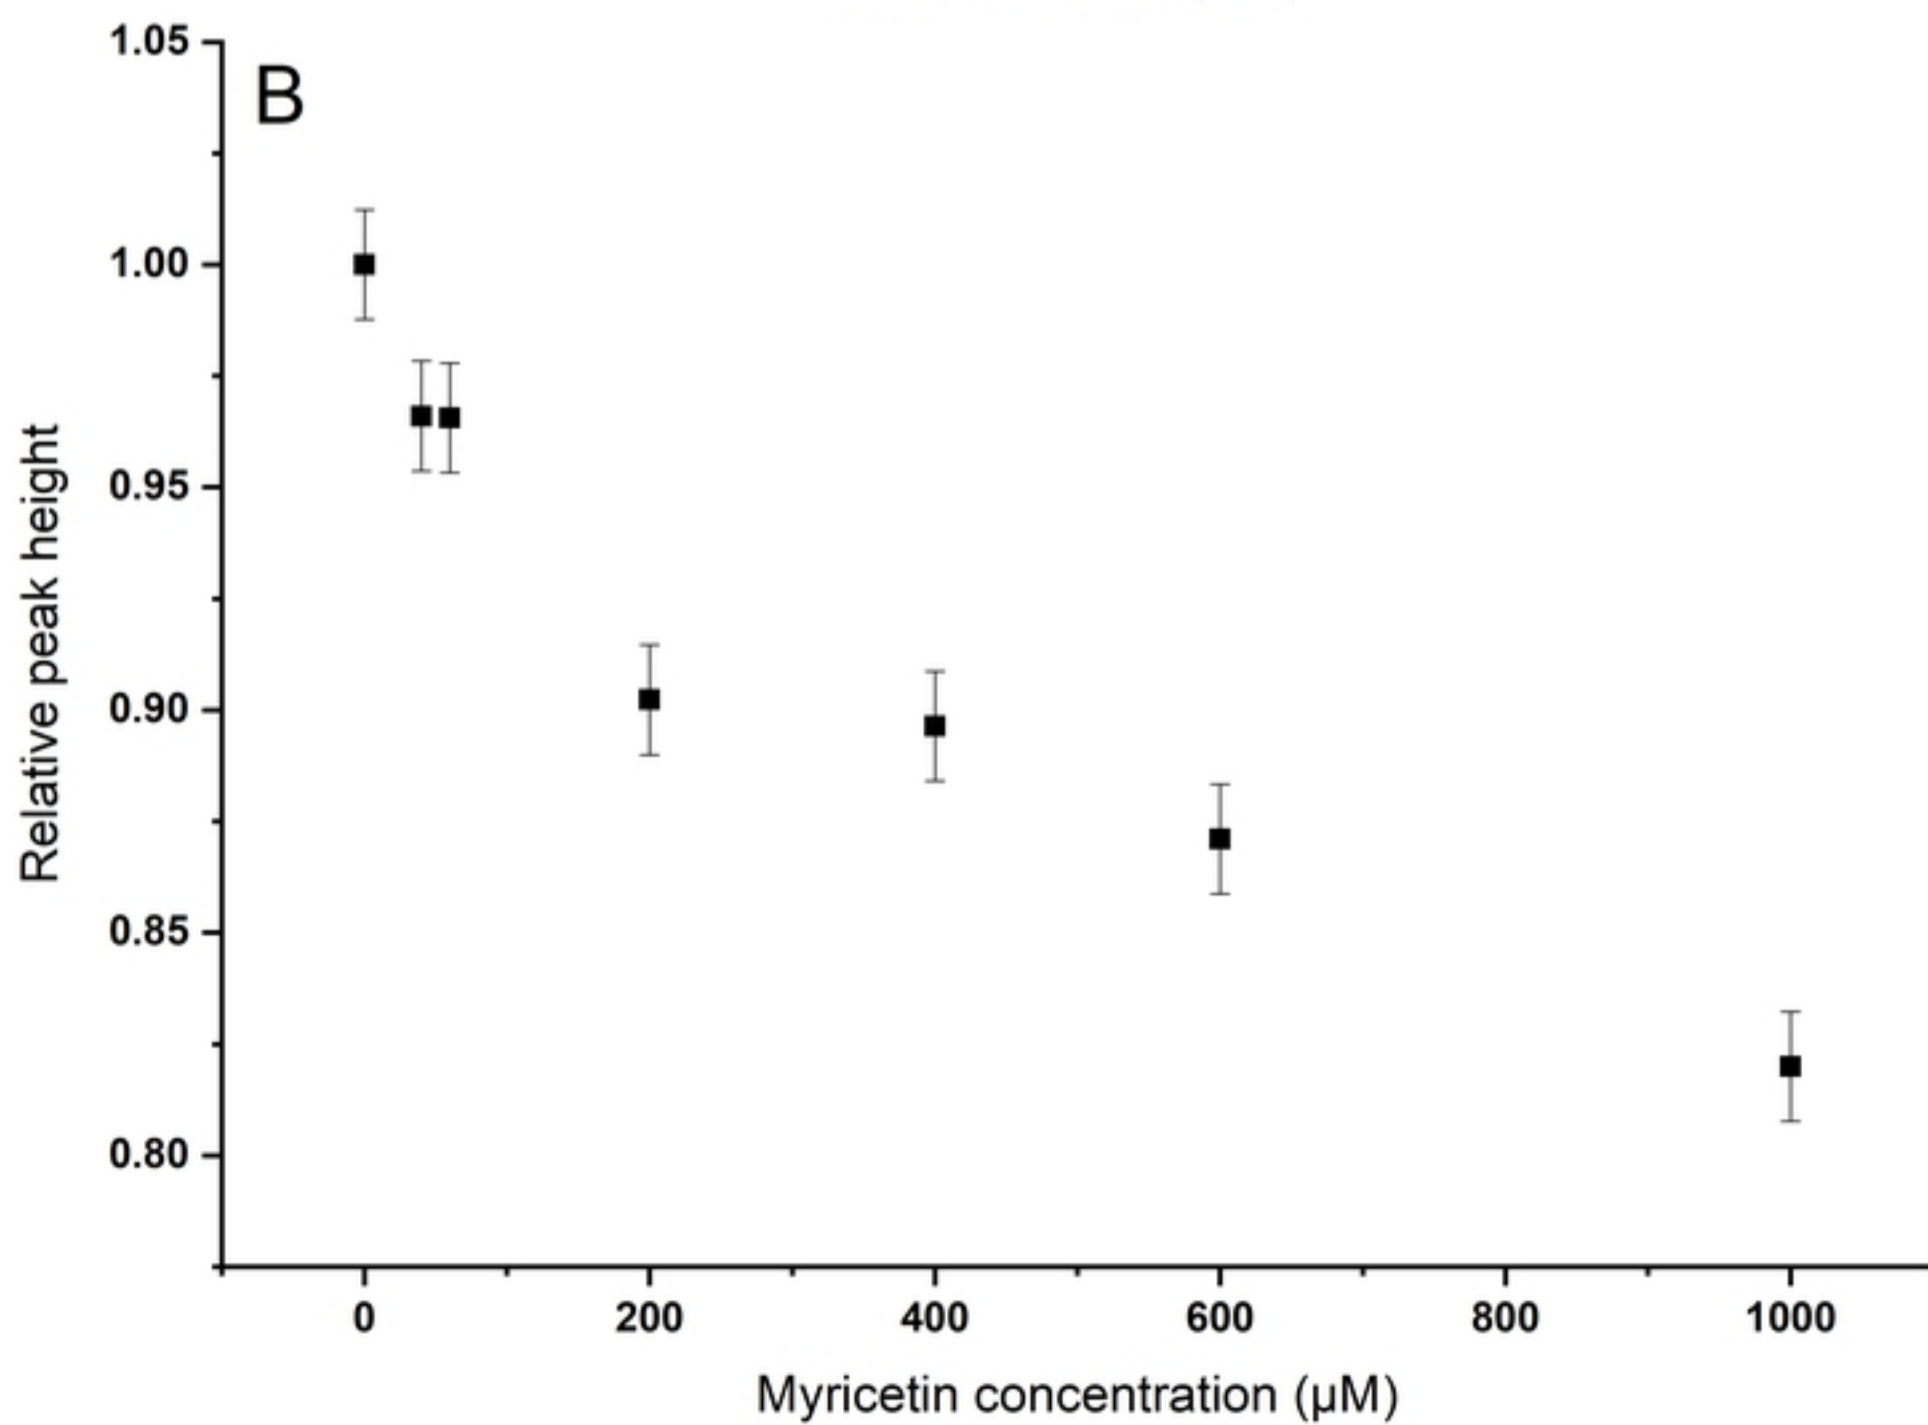

Source: http://biorxiv.org/content/10.1101/816454v1.full.pdf
